# Supplementary material for: Investigation of the Estrogen Receptor-α Gene With Type 2 Diabetes and/or Nephropathy in African-American and European-American Populations
Source: Oxford University Press journal article supplement (doi:10.2337/db06-0303), 2007-02-27
Supplement: pg675supplementarytables1234.doc [file pg675supplementarytables1234.doc]

**Supplementary Table 1** Allele frequencies of AIMs in Yoruba Nigerians (shown as African), AA Controls, AA Cases, and EA Controls.

| **Marker** | **SNP Allele**  **(Major/Minor)** | **Chromosomal**  **Location** | **African**  **MAF**  **(n=120)** | **AA Controls**  **CAF**  **(n=635)** | **AA Cases**  **CAF**  **(n=851)** | **EA Controls**  **CAF**  **(n=282)** |
| --- | --- | --- | --- | --- | --- | --- |
| FY-NULL | G/A | 1q23.2 | 0 | 0.20 | 0.16 | 0.99 |
| F13B | G/A | 1q31.3 | 0.25 | 0.41 | 0.37 | 0.90 |
| TSC1102055 | T/C | 1q32.1 | 0.45 | 0.41 | 0.40 | 0.08 |
| WI-11392 | A/C | 1q42.2 | 0.16 | 0.26 | 0.23 | 0.53 |
| WI-16857 | G/A | 2p16.1 | 0.26 | 0.38 | 0.36 | 0.72 |
| SGC30055 | G/A | 5q23.1 | 0.05 | 0.15 | 0.14 | 0.57 |
| WI-17163 | T/C | 5q33.2 | 0.07 | 0.09 | 0.07 | 0.19 |
| WI-9231 | G/C | 7p22.3 | 0.16 | 0.15 | 0.14 | 0.12 |
| CYP3A4 | G/A | 7q22.1 | 0.23 | 0.35 | 0.34 | 0.94 |
| LPL | T/C | 8p21.3 | 0.03 | 0.14 | 0.13 | 0.51 |
| CRH | C/T | 8q13.1 | 0.36 | 0.42 | 0.39 | 0.93 |
| D11S429 | G/A | 11q11 | 0.08 | 0.15 | 0.16 | 0.50 |
| TYR-192 | C/A | 11q21 | 0 | 0.06 | 0.06 | 0.37 |
| DRD2-*Taq*I "D" | C/T | 11q23.1 | 0.16 | 0.22 | 0.19 | 0.54 |
| GNB3 | T/C | 12p13.31 | 0.14 | 0.27 | 0.26 | 0.67 |
| OCA2 | G/A | 15q13.1 | 0.07 | 0.21 | 0.20 | 0.77 |
| WI-14319 | T/C | 15q14 | 0.28 | 0.34 | 0.33 | 0.23 |
| CYP19 | G/T | 15q21.2 | 0.33 | 0.31 | 0.32 | 0.25 |
| MC1R-314 | A/G | 16q24.3 | 0.40 | 0.36 | 0.34 | 0.14 |
| WI-14867 | T/C | 17p13.2 | 0.04 | 0.11 | 0.12 | 0.47 |
| WI-7423 | C/T | 17p12 | 0 | 0.08 | 0.07 | 0.48 |
| CKM | G/A | 19q13.32 | 0.17 | 0.19 | 0.19 | 0.27 |

MAF: minor allele frequency; CAF: corresponding allele frequency.

**Supplementary** **Table 2** Association analyses of the initial 42 ESR1 SNPs (Round 1 genotyping) with T2DM in 380 AA cases and 276 AA controls.

|  |  |  |  | **P value for Association** | | | | |
| --- | --- | --- | --- | --- | --- | --- | --- | --- |
| **SNP** | **Alleles (Major/Minor)** | **AA Control**  **MAF**  **(n=276)** | **AA Case**  **CAF**  **(n=380)** | **Allelic** | **Genotypic**  **Recessive** | **Genotypic**  **Additive** | **Genotypic**  **Dominant** |  |
| rs2881766 | G/T | 0.40 | 0.37 | 0.18 | 0.95 | 0.19 | 0.05 |  |
| rs488133 | C/T | 0.08 | 0.06 | 0.26 | 0.77 | 0.27 | 0.26 |  |
| rs2071454 | T/G | 0.42 | 0.39 | 0.25 | 0.61 | 0.24 | 0.19 |  |
| rs867239 | C/G | 0.16 | 0.16 | 0.68 | 0.58 | 0.69 | 0.80 |  |
| rs2077647 | T/C | 0.46 | 0.51 | 0.10 | **0.035** | 0.09 | 0.49 |  |
| rs746432 | C/G | 0.06 | 0.05 | 0.31 | 1.00 | 0.29 | 0.29 |  |
| rs11757540 | C/T | 0.21 | 0.24 | 0.30 | 0.25 | 0.30 | 0.47 |  |
| rs6902771 | C/T | 0.50 | 0.49 | 0.78 | 0.99 | 0.78 | 0.65 |  |
| rs4870056 | G/A | 0.50 | 0.49 | 0.86 | 0.83 | 0.86 | 0.94 |  |
| rs9322331 | C/T | 0.13 | 0.11 | 0.26 | 0.52 | 0.28 | 0.13 |  |
| rs2234693 | C/T | 0.45 | 0.46 | 0.61 | 0.73 | 0.61 | 0.63 |  |
| rs9340799 | A/G | 0.28 | 0.29 | 0.74 | 0.50 | 0.74 | 0.96 |  |
| rs1033182 | G/A | 0.11 | 0.07 | **0.013** | 0.90 | **0.018** | **0.008** |  |
| rs2175898 | A/G | 0.07 | 0.08 | 0.72 | 0.29 | 0.73 | 0.92 |  |
| rs11155819 | T/C | 0.14 | 0.12 | 0.22 | 0.98 | 0.24 | 0.17 |  |
| rs7761846 | T/C | 0.29 | 0.30 | 0.70 | 0.20 | 0.70 | 0.83 |  |
| rs12204714 | C/T | 0.31 | 0.30 | 0.47 | 0.88 | 0.47 | 0.30 |  |
| rs1801132 | C/G | 0.12 | 0.11 | 0.46 | 0.53 | 0.46 | 0.33 |  |
| rs3020390 | A/G | 0.33 | 0.30 | 0.30 | 0.79 | 0.29 | 0.23 |  |
| rs1884051 | A/G | 0.49 | 0.54 | 0.11 | 0.25 | 0.10 | 0.14 |  |
| rs985192 | C/A | 0.29 | 0.33 | 0.12 | 0.12 | 0.12 | 0.28 |  |
| rs932479 | T/C | 0.18 | 0.19 | 0.79 | 0.33 | 0.79 | 0.94 |  |
| rs1884052 | C/G | 0.08 | 0.09 | 0.71 | **0.043** | 0.71 | 0.89 |  |
| rs3020404 | A/G | 0.05 | 0.06 | 0.25 | 0.24 | 0.25 | 0.32 |  |
| rs726283 | G/A | 0.21 | 0.18 | 0.24 | 0.96 | 0.24 | 0.16 |  |
| rs932477 | G/A | 0.16 | 0.18 | 0.30 | 0.37 | 0.30 | 0.39 |  |
| rs926777 | A/C | 0.48 | 0.44 | 0.23 | 0.22 | 0.24 | 0.46 |  |
| rs2144025 | C/T | 0.40 | 0.42 | 0.52 | 0.96 | **0.003** | 0.33 |  |
| rs722208 | G/A | 0.40 | 0.40 | 0.90 | 0.10 | 0.90 | 0.28 |  |
| rs1569788 | C/T | 0.38 | 0.39 | 0.69 | **0.043** | 0.69 | 0.36 |  |
| rs2207232 | T/C | 0.15 | 0.19 | **0.049** | 0.23 | **0.043** | 0.06 |  |
| rs3020432 | G/A | 0.32 | 0.32 | 0.89 | 0.21 | 0.89 | 0.58 |  |
| rs3020368 | C/T | 0.13 | 0.12 | 0.83 | 0.28 | 0.83 | 0.60 |  |
| rs1884152 | G/A | 0.43 | 0.44 | 0.90 | 0.72 | 0.90 | 0.91 |  |
| rs2982896 | C/T | 0.13 | 0.13 | 0.86 | 0.73 | 0.86 | 0.75 |  |
| rs2982900 | C/T | 0.05 | 0.02 | **0.042** | 1.00 | **0.038** | **0.038** |  |
| rs2228480 | G/A | 0.18 | 0.15 | 0.09 | 0.24 | 0.08 | 0.11 |  |
| rs2813543 | G/A | 0.06 | 0.05 | 0.74 | 0.41 | 0.75 | 0.87 |  |
| rs2813544 | A/G | 0.20 | 0.21 | 0.75 | 0.46 | 0.75 | 0.94 |  |
| rs926848 | C/T | 0.01 | 0.01 | 1.00 | 1.00 | 0.92 | 0.92 |  |
| rs2813545 | G/C | 0.21 | 0.23 | 0.61 | 0.57 | 0.62 | 0.73 |  |
| rs2747652 | C/T | 0.50 | 0.52 | 0.48 | 0.13 | 0.48 | 0.69 |  |
| rs2813549 | T/C | 0.06 | 0.05 | 0.84 | 0.22 | 0.83 | 0.95 |  |

Bold: SNPs with P value <0.05. MAF: Minor allele frequency; CAF: Corresponding allele frequency.

**Supplementary Table 3** Genotype frequencies for 17 SNPs spanning a contiguous region of ESR1 from intron 1 – intron 2 in African Americans.

| **SNP** | **Alleles (Major/**  **Minor)** | **Controls** | | | **Cases** | | |
| --- | --- | --- | --- | --- | --- | --- | --- |
|  | **1/1*** | **1/2** | **2/2** | **1/1** | **1/2** | **2/2** |
| rs6902771 | C/T | 0.279 | 0.466 | 0.255 | 0.281 | 0.455 | 0.264 |
| rs4870056 | G/A | 0.257 | 0.497 | 0.245 | 0.268 | 0.478 | 0.254 |
| rs9322331 | C/T | 0.752 | 0.230 | 0.018 | 0.776 | 0.200 | 0.025 |
| rs2234693 | C/T | 0.305 | 0.494 | 0.200 | 0.304 | 0.478 | 0.218 |
| rs9340799 | A/G | 0.515 | 0.407 | 0.078 | 0.510 | 0.407 | 0.084 |
| rs7774230 | T/C | 0.295 | 0.486 | 0.219 | 0.302 | 0.473 | 0.225 |
| rs1709181 | C/T | 0.402 | 0.468 | 0.130 | 0.423 | 0.443 | 0.134 |
| rs12664989 | G/C | 0.868 | 0.122 | 0.010 | 0.849 | 0.143 | 0.008 |
| rs712221 | T/A | 0.388 | 0.477 | 0.135 | 0.425 | 0.443 | 0.132 |
| rs1514348 | G/T | 0.394 | 0.475 | 0.130 | 0.428 | 0.437 | 0.136 |
| rs11155818 | G/A | 0.835 | 0.153 | 0.013 | 0.804 | 0.180 | 0.016 |
| rs827417 | A/G | 0.809 | 0.184 | 0.007 | 0.844 | 0.147 | 0.008 |
| rs2431260 | G/C | 0.832 | 0.165 | 0.003 | 0.813 | 0.176 | 0.011 |
| rs1709183 | A/G | 0.415 | 0.462 | 0.123 | 0.375 | 0.486 | 0.139 |
| rs1033182 | G/A | 0.847 | 0.145 | 0.008 | 0.901 | 0.092 | 0.007 |
| rs2175898 | A/G | 0.881 | 0.114 | 0.005 | 0.865 | 0.127 | 0.008 |
| rs11155819 | T/C | 0.789 | 0.195 | 0.016 | 0.810 | 0.173 | 0.017 |

*Allele “1” represents the major allele, and allele “2” the minor allele.

**Supplementary Table 4** Admixture-adjusted single SNP T2DM association analyses of 17 SNPs spanning a contiguous region of ESR1 from intron 1 – intron 2 in African Americans.

|  |  | |  | |  | |  |  | | |
| --- | --- | --- | --- | --- | --- | --- | --- | --- | --- | --- |
|  |  |  | |  | | **P-value for admixture-adjusted association** | | | | |
| **SNP** | **Alleles (Major/**  **Minor)** | **Control MAF**  **(n=635)** | | **Case CAF**  **(n=851)** | | **Allelic** | | **Genotypic**  **Recessive** | **Genotypic**  **Additive** | **Genotypic**  **Dominant** |
| rs6902771 | C/T | 0.49 | | 0.49 | | 0.70 | | 0.55 | 0.66 | 0.88 |
| rs4870056 | G/A | 0.49 | | 0.49 | | 0.44 | | 0.54 | 0.90 | 0.67 |
| rs9322331 | C/T | 0.13 | | 0.13 | | 0.59 | | 0.49 | 0.68 | 0.48 |
| rs2234693 | C/T | 0.45 | | 0.46 | | 0.23 | | 0.50 | 0.79 | 0.85 |
| rs9340799 | A/G | 0.28 | | 0.29 | | 0.93 | | 0.63 | 0.49 | 0.54 |
| rs7774230 | T/C | 0.46 | | 0.46 | | 0.55 | | 0.73 | 0.99 | 0.75 |
| rs1709181 | C/T | 0.36 | | 0.36 | | 0.78 | | 0.97 | 0.55 | 0.39 |
| rs12664989 | G/C | 0.07 | | 0.08 | | 0.53 | | 0.96 | 0.30 | 0.25 |
| rs712221 | T/A | 0.37 | | 0.35 | | 0.72 | | 0.80 | 0.25 | 0.15 |
| rs1514348 | G/T | 0.37 | | 0.35 | | 0.95 | | 0.88 | 0.38 | 0.19 |
| rs11155818 | G/A | 0.09 | | 0.11 | | 0.26 | | 0.62 | 0.15 | 0.14 |
| rs827417 | A/G | 0.09 | | 0.08 | | 0.28 | | 0.45 | 0.31 | 0.21 |
| rs2431260 | G/C | 0.09 | | 0.10 | | 0.11 | | 0.14 | 0.29 | 0.43 |
| rs1709183 | A/G | 0.35 | | 0.38 | | 0.21 | | 0.54 | 0.25 | 0.25 |
| rs1033182 | G/A | 0.08 | | 0.05 | | **0.027** | | 0.90 | **0.016** | **0.009** |
| rs2175898 | A/G | 0.06 | | 0.07 | | 0.18 | | 0.63 | 0.41 | 0.44 |
| rs11155819 | T/C | 0.11 | | 0.10 | | 0.62 | | 0.65 | 0.65 | 0.51 |
